# Supplementary material
Source: Springer Nature journal article supplement (https://www.springermedizin.de/resource/supplementary/12876_2003_63_MOESM3_ESM.pdf/9438622)

# MEAN DAILY WATER INTAKE

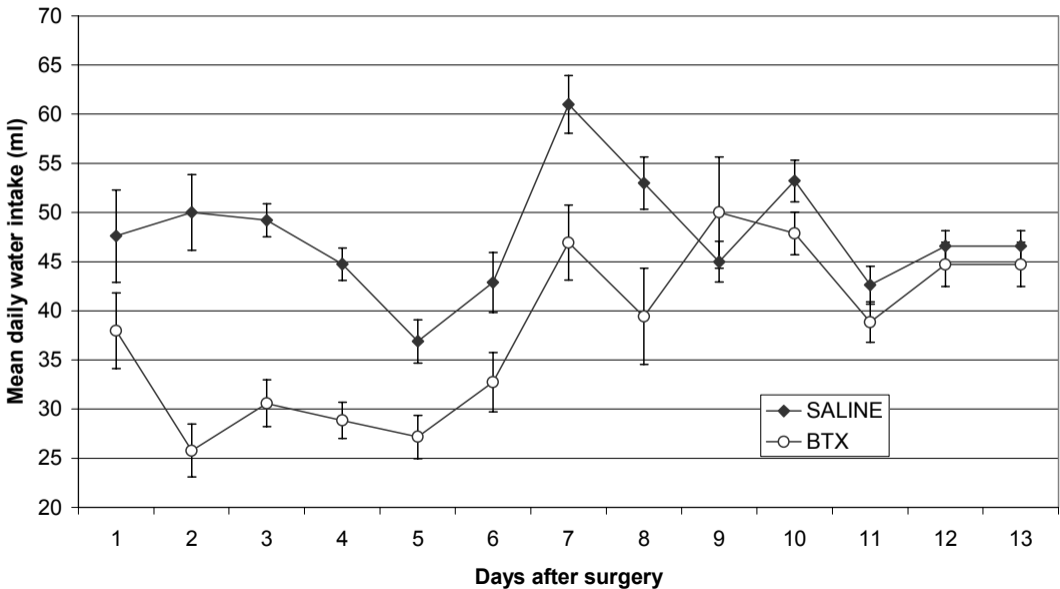

Supplement: MOESM3 [file 9438622]
